**Title:** Chimpanzee (*Pan troglodytes verus*) density and environmental gradients at their biogeographical range edge

**Running title:** Chimpanzee density and environmental gradients at the range edge

Erin G. Wessling<sup>a,b</sup>, Paula Dieguez<sup>a</sup>, Manuel Llana<sup>c</sup>, Liliana Pacheco<sup>c</sup>, Jill D. Pruetz<sup>d</sup>, Hjalmar S. Kühl<sup>a</sup>

<sup>a</sup> Max Planck Institute for Evolutionary Anthropology, Deutscher Platz 6, 04103 Leipzig, Germany

<sup>b</sup> Harvard University, 11 Divinity Ave, Cambridge, MA, USA

<sup>c</sup> Instituto Jane Goodall España, Station Biologique Fouta Djallon, Dindéfelo, Région de Kédougou, Senegal

<sup>d</sup> Texas State University, San Marcos, Texas, USA

**Corresponding Author:**

Erin G. Wessling

Department of Human Evolutionary Biology

Harvard University

Email: ewessling@fas.harvard.edu

ORCID ID: 0000-0001-9661-4354

**ABSTRACT**

Identifying ecological gradients at the range edge of a species is an essential step for revealing the underlying mechanisms and constraints that limit the species' geographic range. Here, we aimed to describe the patterns of variation in chimpanzee density and habitat characteristics perpendicular to the northern range edge and to investigate potential environmental mechanisms for chimpanzee distribution in a savanna-mosaic habitat. We estimated chimpanzee densities at six sites forming a 126km latitudinal gradient at the biogeographical range edge of the western chimpanzee in the savanna-mosaic habitats of southeastern Senegal. To accompany these data, we used systematically placed vegetation plots to characterize the habitats at each site for habitat heterogeneity, tree density and size, floral assemblages,

among other variables. We found that both biotic and abiotic factors represent potential determinants of the chimpanzee range limit in this ecoregion. Specifically, chimpanzee-occupied landscapes at the limit had smaller available floral assemblages, less habitat heterogeneity, and contained fewer closed canopy habitats in which chimpanzees could seek refuge from high temperatures than landscapes farther from the range limit. This pattern was accompanied by a decline in chimpanzee density with increasing proximity to the range limit. Our results provide several indications of the potential limits to the chimpanzee niche and the implications of these limits to chimpanzee biogeography, especially in the face of climate change predictions, as well as to species distributional modeling more generally.

**Keywords:**

niche | habitat | food availability | ecography | thermoregulation | savanna-mosaic | limit

**INTRODUCTION**

Predominant niche theory predicts that habitat suitability is expected to be highest at the center of a species' range and decrease towards the outer boundaries of where that species is found (Hutchinson, 1961; Brown 1984; Brown et al.1995; Holt, 2009). As the conditions for habitat suitability decrease, species density likewise is expected to decrease, so that densities should be lowest at the range edge (Kawecki 2008; Sexton et al. 2009). Patterns of species density distributions can vary considerably depending on the limiting factors that dictate them. Accordingly, species densities may decline gradually across the range towards the edges or may remain stable across the range until dropping off at the very limits of niche tolerance (Brown 1984; Brown et al.1995). Additionally, many species' ranges extend outside of what is considered suitable habitat into marginal habitats. These habitats represent a transition zone or 'bleed-over' of individuals from suitable habitats into unsuitable habitats and allow for little margin of variation of environmental factors before they become uninhabitable (Kawecki 2008). As such, these marginal habitats may become population sinks, solely supported by immigration from more suitable habitats (Pulliam 1988; Marshall 2009; Smith et al. 2011). The gradient of habitability at the range edge may thus represent an important natural scenario in which to investigate environmental drivers of biogeographic limitations.

57

58 Drivers of biogeographic limitations are typically investigated in small-bodied organisms (e.g., Chown and  
59 Gaston 1999; Hargreaves et al. 2014; Cahill et al. 2014), likely because investigating range constraints in  
60 large-bodied, long lived species, such as the chimpanzee, is challenging. Despite the challenges, as the  
61 underlying processes of range biogeography may be expected to differ between short- versus long-lived  
62 species due to differences in their life history strategies, investigating range constraints of long-lived  
63 species is essential for a comprehensive understanding of these processes. For example, Marshall et al.  
64 (2009a) suggested the unique importance of fallback foods in defining habitat carrying capacity for long-  
65 lived species because of their prioritization of survivorship compared to short-lived species who typically  
66 prioritize high reproductive rates.

67

68 Limitations to chimpanzee distribution at the range edge have been linked to thermoregulatory limitations  
69 (McGrew et al. 1981), decreased floral richness and diversity (Kortlandt 1983), time constraints (Korstjens  
70 et al. 2010), and water scarcity (Lindshield 2014), although none have been extensively investigated. A  
71 number of large-scale chimpanzee ecological niche models (ENMs), or distribution models, have offered  
72 insights into the factors that influence chimpanzee distribution and site occupancy (Junker et al. 2012;  
73 Foerster et al. 2016; Sesink Clee et al. 2015; Jantz et al. 2017; Abwe et al. 2019; Heinicke et al. 2019a),  
74 although these models typically evaluate characteristics of the chimpanzee niche at large. Larger-scale  
75 analyses depend on derivable data obtained from remote sensing, which may only best serve as proxies  
76 (e.g. percent forest cover, climate averages, human population indices, land cover classifications,  
77 distance to roads and rivers) for smaller-scale metrics like habitat heterogeneity or food species  
78 assemblages. Small-scale metrics therefore offer insights into more direct, proximate drivers of  
79 chimpanzee distribution and niche suitability in ways in which broader-scale derived metrics attempt to  
80 proxy (Foerster et al. 2016). However, they are rarely included in these models as they are either  
81 unavailable or not easily inferable from the methods used for larger-scale analyses (although see  
82 Foerster et al. 2016). For example, chimpanzees are unlikely to evaluate habitat for suitability based on  
83 percent forest coverage within the landscape (e.g., McGrew et al. 1988; Junker et al. 2012; Heinicke et al.  
84 2019a), but percent forest cover may be a proxy of potential shade and food resources available which

would be considered directly relevant to chimpanzee daily life and space use. In this way, smaller-scale studies can offer a more direct understanding of proximate mechanisms on species occupancy variation.

Finer-scale correlates of chimpanzee density variation have been extensively investigated within the forested habitats of East and Central Africa (Balcomb et al. 2000; Potts et al. 2009; Bortolamiol et al. 2014; Foerster et al. 2016; Potts and Lwanga 2013; Potts et al. 2015; Nguet et al. 2016). As chimpanzees demonstrate a preference for ripe fruit over other food types (Wrangham 1977; Conklin-Brittain et al. 1998), evaluated predictors of chimpanzee densities often center around the availability of this food. Certainly, variation in the availability of fruit resources has been linked to various aspects of chimpanzee social life (e.g., Chapman et al. 1995; Boesch 1996; Murray et al. 2006; Wittiger & Boesch 2013; Samuni et al. 2018), physiology (e.g., Wessling et al. 2018a,b; Emery Thompson et al. 2009, 2010) and subsequent reproductive output (e.g., Pusey et al. 1997; Emery Thompson et al. 2007). Therefore, it is expected that variation in these resources should impact chimpanzee abundances. Similar patterns have been investigated in a number of frugivorous bird species (e.g., Rey 1995; Restrepo, Gomez, and Heredia 1999; Mogenburg and Levey 2003; Seoane et al. 2006), other apes (e.g., Vogel et al. 2015; Pennec et al. 2016; Marshall and Leighton 2006; Marshall et al. 2014), and other primate species (e.g., Kinnaird and O'Brien 2005; Milton et al. 2005; Rovero and Strusaker 2007), demonstrating that many frugivores are able to track fruiting patterns at small spatial and temporal scales, and that fruit availability can be a driver of frugivorous species' abundance (White 1978). However, while fruit availability may be a strong predictor of chimpanzee abundance, it does not necessitate that it is the sole environmental component dictating chimpanzee biogeography.

For example, the extent to which fruit species density may remain relevant in dictating chimpanzee distribution in the savanna-mosaics of West Africa is unclear as factors like thermoregulation and dehydration have been demonstrated to play stronger seasonal roles than energetic constraints at the individual level in these habitats (Wessling et al. 2018b). That thermoregulation or water availability also dictate the chimpanzee range limit would not be unusual for a primate. Climatic constraints to species biogeography are the most common of range constraints and are thought to be specifically limiting to a

number of primate genera (Korstjens et al. 2010; Stone et al. 2013). For example, areas rich in food resources have even been observed to be ignored by baboons if they were too far from water sources (Altmann 1974; Hamilton et al. 1976), suggesting food availability may become irrelevant to species otherwise constrained climatically.

Consequently, the relative importance of environmental components may shift from within the range towards its limits, regardless of habitat suitability. McGrew et al. (1981) argued that tree densities likewise play a role shaping this range limit in the sense that closed canopy habitats (e.g. gallery forests) within these landscapes offer refuge from the hot and difficult climate conditions. Kortlandt (1983) alternatively argued that chimpanzees rely on diverse plant assemblages to support their equally diverse diet, and that an ultimate characteristic of the chimpanzee range limit in savanna-mosaics is likely to be strictly related to plant species richness. Savanna-mosaic habitats are predicted to harbor lower tree densities overall compared to forested habitats (Crowther et al. 2015). Yet, in a comparison of isotopic evidence perpendicular to the range limit, Wessling et al. (2019) failed to identify patterns of isotopic variation that would suggest that chimpanzees at the range limit experience higher degrees of nutritional scarcity or starvation. Instead, they suggested that chimpanzees at the range limit are likely compensating for potential nutritional scarcity using fallback food items high in  $\delta^{13}\text{C}$ , such as flowers, domestic cultivars, or grasses. However, the assumption that habitat suitability decreases at this range limit remains untested, and these results may alternatively indicate that the sites in the isotope study (Wessling et al. 2019) did not vary in their ability to support chimpanzees.

Generally, the chimpanzee biogeographic range is limited at many edges by geographic barriers (e.g., the ocean, the Congo River, disturbance in the Dahomey gap), and remaining natural edges are rare. The northern limit of the western chimpanzee range therefore presents a unique opportunity to investigate environmental correlates of otherwise unhindered chimpanzee distribution. Therefore, in this study we set out to investigate the nature of the chimpanzee biogeographical range edge in southeastern Senegal. Specifically, we aim to describe the patterns of variation in chimpanzee density and habitat characteristics perpendicular to their biogeographical range limit, and to investigate potential environmental candidates

for the structure of the chimpanzee range edge in this savanna-mosaic landscape. Here we define the range limit as the last biogeographical point at which a species (in this case, chimpanzee) can be found, and a range edge as the region near to the range limit at which species densities are expected to decline. This decline may occur over the large or small scale and may occur across a single or multi-dimensional niche space. We hypothesize that chimpanzee habitat suitability decreases with increasing latitude (and therefore proximity to the presumed range limit), and therefore in turn chimpanzee densities likewise decrease. As habitat suitability may be characterized in a number of ways, we specifically predict that (1) tree density, (2) tree size (i.e., DBH), (3) number of available food species, (4) proportion of trees within preferred food categories, and (5) available refuge habitats (i.e., closed canopy habitats) would decrease with increasing latitude (i.e., proximity to the distributional limit).

Alternatively, as common determinants of species' range limits, abiotic factors such as temperature or rainfall may be stronger determinants of the range than the aforementioned biotic metrics (which are ultimately also shaped by abiotic conditions). Therefore, we consider the alternative hypothesis that abiotic factors directly determine the chimpanzee range limit in savanna-mosaic habitats (McGrew et al. 1981), with the specific prediction that temperature increases and rainfall decreases towards the range limit, as would be suggested by long-term national-level climatic models (Fall 2006). It is important to note that these two hypotheses (abiotic vs. biotic determinants) are not mutually exclusive but are likely to collectively contribute as a suite of habitat characteristics to the definition of the range limit. In this study we are not able to address the relative strength of each hypothesis, but rather investigate available support for each. Nonetheless, the advantage of our approach is that we investigate these processes within a single ecoregion (i.e., savanna-mosaic woodland), and therefore are unburdened by other potentially confounding variables attendant to large-scale ENMs.

Lastly, our investigation is accompanied by the assumption that the limit is determined to some degree by naturally occurring bottom-up processes (e.g., food availability) and not solely by top-down processes (e.g., predator abundance or anthropogenic disturbance). Realistically, anthropogenic disturbance has had historical effects in the region over decades (e.g., Mbow et al. 2000; Tappan et al. 2004) and is

expected to continue to play an indirect role in shaping biotic landscape metrics. However as hunting chimpanzees is a regional taboo (Heinicke et al. 2019a) and therefore anthropogenic influence is predominantly indirect, our study remains an investigation of the consequent bottom-up processes (natural or otherwise) dictating chimpanzee range limits.

## **METHODS**

Data were collected at six sites located along a latitudinal gradient in southeast Senegal (Figure 1; Table 1). This region of Senegal is located within the Shield ecoregion (Tappan et al. 2004) and is generally described as a highly seasonal savanna-woodland mosaic comprising gallery forest, woodland, and grassland. It is likewise considered particularly extreme in comparison to other habitats where chimpanzees are studied due to the extensive dry season and comparatively hot temperatures (Pruetz and Bertolani 2009; Wessling et al., 2018a). The six sites in this study include the habituated research group of the Fongoli Savana Chimpanzee Project (FSCP), two unhabituated chimpanzee research sites (Kayan, and the RNCD: Réserve Naturelle Communautaire de Dindéfelo, hereafter Dindefelo) of the Pan African Programme (PanAf: <http://panafrican.eva.mpg.de>), and three additional unhabituated chimpanzee sites (Kanoumering, Makhana, Hérémakhono). The chimpanzees at Dindefelo have been under continued biomonitoring since 2009, prior to the adoption of the PanAf protocol in 2016. Our discovery of chimpanzees at Hérémakhono led to amendments of the IUCN range limits for the western chimpanzee, as chimpanzees had not previously been reported north of the Parc National de Niokolo Koba (Figure 1; Humle et al. 2008; Humle et al. 2016). Based on data collected via interviews and reconnaissance surveying at eight sites north of the Hérémakhono site, Wessling et al. (2019) previously suggested that Hérémakhono represents the very northern-most vestige of chimpanzee distribution or is expected to be very near to it. Additionally, these results match similar findings by Lindshield et al. (2014) who surveyed an additional five sites north of Hérémakhono to confirm chimpanzee absence. While it is possible that chimpanzees continue to range north of Hérémakhono, these survey campaigns were specifically directed at range limit discovery and failed to detect chimpanzee presence in any locality to the north of our study area, supporting that Hérémakhono likely represents or is near to the northern-most location in which chimpanzees range.

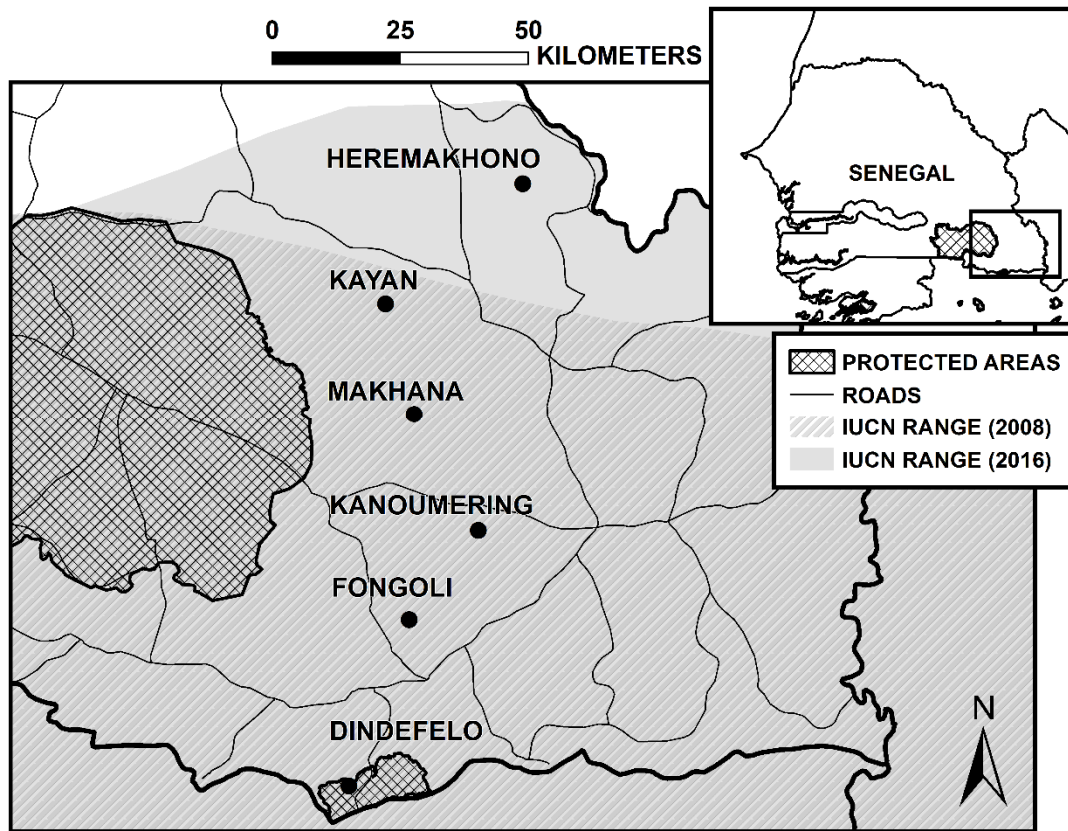

**Figure 1.** Map of study area, including six study sites, relative to protected areas (depicted in crossed lines), and the current and former IUCN *P.troglodytes verus* range limit (Humble et al. 2008, 2016) depicting the update for inclusion of the Hérémakhono site.

Two sites (Kayan and Makhana) are in relative proximity of the Parc National de Niokolo Koba, in which no villages or roads exist between the study areas and the boundaries of the Park, whereas Dindefelo is a formally-recognized community reserve. Hérémakhono and Fongoli, however, are located in close proximity with one or more villages and include minor degrees (<5% land cover; Wessling unpublished data; Bogart and Pruetz 2011) of anthropogenic habitats within the landscapes (e.g., agricultural fields). Kanoumering, while comparatively remote, had minor degrees of human foot traffic and disturbance for gold mining exploration at the time of research, but appeared otherwise undisturbed by land conversion. In total, these six sites represent approximately the northern 126km of the range edge in West Africa. We noted impacts of bush fires and felling for livestock at all six sites. Other indications of human activity included but was not limited to vehicle roads for former (Makhana) and ongoing (Fongoli) gold exploration, artisanal logging (Hérémakhono, Fongoli, Dindefelo) and gold mining (Fongoli,



Hérémakhono), and palm wine collection (Kanoumering). These observations indicate that all six sites suffer from some degree of anthropogenic disturbance, although we do not quantify these patterns here.

#### *Chimpanzee Density and Habitat Data Collection*

In the cases of previously un-surveyed sites (Kanoumering, Makhana, Kayan, Hérémakhono), initial reconnaissance (recce) surveys were conducted to identify contiguous areas of chimpanzee presence at each site. A one km by one km contiguous grid system was overlaid at each site to contain locations in which nests were discovered during recce surveys until at least 20 grid cells had been placed. We chose 20 cells as a minimum to maintain consistency with the PanAf protocol (<http://panafrican.eva.mpg.de/>) minimum. For the two pre-existing sites (Fongoli and Dindefelo), a minimum number of 20 grid cells were overlaid on known chimpanzee community home ranges. Continuous presence at the two PanAf sites (Kayan and Dindefelo) allowed us to extend the grid system over a greater extent of chimpanzee home range use (up to 79 km<sup>2</sup>). Despite site differences in survey area, all subsequent measures described in this manuscript naturally account for differences in research area. Data at all sites were collected over one annual cycle. We used chimpanzee nests, commonly used as signs of chimpanzee presence (Kühl et al. 2008), to estimate chimpanzee densities at each site. Along the north to south mid-point of each grid cell, straight line transects were walked to estimate chimpanzee abundance using the distance sampling methodology (Buckland et al. 2001; Kühl et al. 2008), and the perpendicular distance from the transect to each discovered nest was recorded. In Kayan and Dindefelo where the research area was extensive, transects were walked in alternating grid cell lines (i.e., 2km longitudinal distance between continuous transects). Each set of transects were subsequently resurveyed 1-2 times at intervals between two and eight months except for Fongoli which was sampled only once due to time constraints. Line transects were predominately surveyed during the dry season (October – April) under conditions of good visibility, per standard surveying protocols (Kühl et al. 2008). However, sites which were surveyed in three rounds (Kanoumering, Makhana, and Kayan) were surveyed once during the wet season (June – September) to maintain even temporal distribution; wet season perpendicular distances did not markedly differ from dry season rounds at these sites although nest discoverability was considerably lower (41% on average of dry season counts). Total transect lengths and survey length are described in Table 1.

We calculated chimpanzee densities ( $D$ ) using the following equation:  $D = N / (2 * L * ESW * p * r * t)$ , where  $N$  is number of nests discovered within the truncation distance,  $L$  is the length of the transect,  $ESW$  is the effective strip width,  $p$  is the proportion of nest builders,  $r$  is the nest production rate and  $t$  is the nest decay rate (Buckland et al. 2001; Kühl et al. 2008). We calculated the effective strip width ( $ESW$ ) based on perpendicular distances from the transect at Makhana, Kanoumering, and Fongoli using the 'Distance' package (Miller 2017; Thomas et al. 2010) in the statistical software R (version 3.6.1; R Core Team 2019). We were unable to include Dindefelo, Kayan, or Hérémakhono in our calculation of  $ESW$  as perpendicular distances had not been recorded at these sites, and therefore based density estimations for all sites based on a single pooled  $ESW$ . This method is appropriate under the reasonable assumption that nest discoverability remains constant across the savanna-mosaic ecoregion (i.e., areas where ecosystems are generally similar; Buckland 2001) and averages out potential stochastic (i.e., random) influences that may have arisen with smaller, locally scaled site-based datasets. We used 63.22 m as the truncation distance when calculating  $ESW$ , as this was the maximum perpendicular distance observed once a single extreme outlier (183m) was excluded from the dataset.  $ESW$  was  $32.80\text{m} \pm 3.73$  ( $\pm$  SE), based on the best fit of the half-normal key function with a cosine adjustment of order 2 and 3 to our data (Figure S1). To complete the equation, we used a nest production rate of 1.142 nests per individual (Kouakou et al. 2009), 0.83 as the proportion of nest builders (Plumptre and Cox 2006), and a nest decay rate of 243 days per nest based on data collected in Dindefelo (Heinicke et al. 2019a). To ensure that wet season surveying did not impact our evaluation of latitudinal patterns on chimpanzee density, we additionally estimated chimpanzee densities at sites which had been surveyed during the wet season, with wet season surveys excluded. Although densities at these sites were slightly higher based on dry season surveys, they had no effect on latitudinal patterns in chimpanzee densities and we therefore report results from our complete surveys only.

In addition to straight line transects for chimpanzee density calculations, we also collected environmental data for each site using vegetation plots centered along these transects. Diameter at Breast Height (DBH), location, and species identification data were collected for trees 10cm or larger DBH within 20 by

20 m plots spaced at 100 m meter intervals. Due to the extent of the grid systems at the PanAf sites, vegetation plots were instead placed either at one corner of each grid cell and at the end of transects (Kayan) or at 200m intervals (Dindefelo). Data collection in logistically unfeasible (e.g., steep rock faces) vegetation plots was abandoned (n=14). A single plot was missed at Makhana and additionally sampled at Hérémakhono in error. Vegetation plot sampling was not conducted at Fongoli due to time constraint. Data collected from a 3.4 km by 20 m phenology transect placed randomly within the Fongoli home range (traversing but not parallel to the transect for nest surveying) can nonetheless offer an estimate of DBH and tree genera composition. Due to difficulty identifying species within specific genera (e.g., *Acacia*, *Ficus*), all subsequent analyses operate at the level of the genus. Basal area was calculated as the sum of the basal area ( $\text{area} = (0.5 * \text{DBH})^2 * \pi$ ) of all trees in the site, divided by area of vegetation plots surveyed.

Lastly, we collected year-round data on daily temperature at each site using a min-max hygrometer. Daily midpoint temperature (i.e., midpoint between minimum and maximum daily temperatures) and daily maximum temperature were averaged across one annual cycle as an indicator of temperature extremes at each site. These two variables were previously demonstrated to represent separate climatic phenomena at Fongoli (Wessling et al. 2018b). Unfortunately, consistent rainfall data were not collected for a full annual cycle across three of the six sites. We therefore extracted average annual rainfall (years 1970-2000) from the global BIOCLIM dataset (Fick et al. 2017) at approximately 1 km resolution (30' latitude), and evaluated these averages relative to the three sites for which we could reliably measure daily rainfall across an entire year (Fongoli, Dindefelo, Kayan) using a rain gauge located at each research station.

### *Data Analyses*

In order to evaluate potential habitat differences among sites, we summarized habitat characteristics in a number of ways. Tree density was calculated using the number of all trees located within the vegetation plots divided by total area of vegetation plots or phenology transects surveyed at each site. To contextualize floral assemblages at each site, we discuss tree genera within the context of chimpanzee

298 dietary composition. As Fongoli is the only habituated community within our sample and therefore the  
299 only site from which a full catalogue of diet is confirmed (Pruetz 2006), we assumed that the Fongoli diet  
300 was representative of the foundation of the diets of all other communities in our sample. Several lines of  
301 evidence support that there is significant dietary overlap across these sites (Wessling et al. 2019; Pan  
302 African Programme, unpublished data). We therefore categorized tree genera according to the following  
303 potential dietary categorizations: consumed fruit genera, consumed non-fruit genera, non-consumed  
304 genera, as well as the *post-hoc* addition of non-consumed and consumed *Acacia* species. We added the  
305 last two categories related to the *Acacia* genus following the in-field observation of significant amounts of  
306 *Acacia* trees at Hérémakhono, and therefore divided these categories to also allow for evaluation of  
307 *Acacia* distribution across latitudes. Only two *Acacia* species are consumed by Fongoli chimpanzees for  
308 their dry fruits (*A. ehrenbergiana* and *A. polycantha*). As chimpanzees are ripe fruit specialists and  
309 arguably prefer fleshy fruits over dry fruits, we also calculated tree density of all fleshy fruit species that  
310 fall within the Fongoli diet (Pruetz 2006). Fleshy fruits are defined as fruits that contain a soft pulp or juice  
311 at the time of consumption, although this excludes exceptions like *Adansonia* which is a preferred food  
312 species by the Fongoli chimpanzees (Pruetz 2006).

313  
314 We used site averages of number of trees per vegetation plot as both a measure of tree abundance as  
315 well as a measure of tree distribution across each site, and therefore as a proxy of landscape  
316 characteristics or heterogeneity of vegetative types within the landscape (Figure 2). If total tree density  
317 remains constant among the sites but standard deviation in the number of trees per plot vary, then the  
318 distribution of the same number of trees within the landscape will likewise vary. The number of trees per  
319 plot can additionally be used as an objective measure of habitat classification. Specifically, we used two  
320 arbitrary definitions of “high tree density habitat” as habitat classifications are often subjective and can  
321 suffer from issues of consistency and inter-study disagreement (van Leeuwen et al. this issue). We  
322 therefore assigned an objective threshold of 50% or 66% or more of the maximum number of trees per  
323 plot in the dataset (32 trees) to serve as a proxy for comparison of the distribution of potentially closed  
324 canopy type habitats among the sites, with the assumption that plots in the highest percentage of all plots  
325 share likeness with closed canopy habitats like gallery forest. Due to the structure of the Fongoli data

(one continuous transect), we did not include Fongoli in these analyses, as the savanna-mosaic ecoregion is markedly heterogeneous in vegetative structure and therefore a transect 3.4 km in length is unlikely to accurately reflect site-level tree density and composition at Fongoli. Additionally, subsampling of the transect will not result in a sufficient number of spatially independent plots to accurately estimate these metrics, as a minimum number of 100 spatially-explicit plots per site is needed to estimate these characteristics in this landscape (See Electronic Supplementary Material [ESM] for information on minimum sampling thresholds). While sampling at Kayan likewise did not exceed this threshold, sampling is still likely to estimate these metrics with moderate precision (See ESM). We therefore include Kayan but not Fongoli in these analyses.

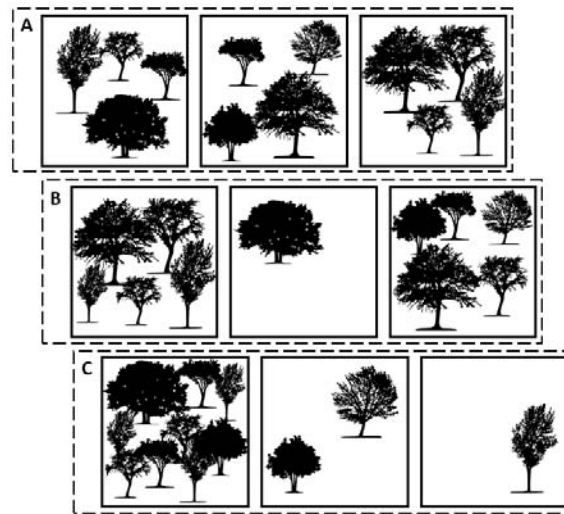

**Figure 2.** Example of variation in landscape characteristics in three fictional sites with three vegetation plots each. All three sites have identical tree density (12 total trees / area) and average number of trees per plot (mean: 4 trees per plot). SD of trees per plot varies across sites (A: 0, B: 2.3, C: 4.3), as an indicator of habitat heterogeneity within a landscape. Number of high-density plots (defined here as min. five trees per plot) likewise varies despite identical tree densities (A: 0, B: 2, C: 1).

All analyses were conducted in the statistical software R (version 3.6.1; R Core Team 2019). To evaluate potential range limit effects on chimpanzee densities and a number of potentially relevant environmental variables across the six sites, we conducted spearman's rank correlation tests with the centered latitude of each site's grid system as a predictor. These environmental variables included mean and maximum daily temperatures, rainfall, total basal area, total and fleshy fruit tree species density, percent of high-density plots, number of food and fruit genera, and percentages of food categories. To resolve the issue

of dichotomized decisions about significance at a fixed threshold we report p-values between 0.05 and 0.1 as a 'trend' for all models (Stoehr 1999).

Our assessment of the correlations between the various environmental variables with latitude was hampered by issues of (i) multiple testing and (ii) the correlations lacking independence as the environmental variables might be interrelated themselves. To tackle both issues we used an approach developed by Potter & Griffiths (2006), which is a combination of Fisher's omnibus test (Haccou & Meelis, 1994; Quinn & Keough 2002, P. 50) and a permutation test (Adams & Anthony 1996). More specifically, we first determined the exact P-value (Siegel & Castellan 1988; Mundry & Fischer 1998) for each of the correlations and then condensed them into a single quantity using  $X^{2'} = -2 \times (\log_e P)$ , where log is the natural logarithm. In case the P-values were independent, one could assess the significance of the resulting quantity by comparison with a chi-square distribution, but the lack of independence of P-values invalidates this approach. This can be overcome by a means of a permutation test which randomly shuffles latitudes across sites while keeping the associations of the environmental variables within sites unaffected (keeping their non-independence). A complication arose from the fact that we did not record six of the environmental variables at Fongoli (tree and fleshy fruit tree density, BA, number of trees per plot, high density plots-66%, high density plots-50%). For the environmental variables comprising the missing value we did not include Fongoli's latitude in the permutation. We then determined the exact P-value for each of the correlations between the environmental variables and the permuted latitude and then combined them into  $\chi^2$  as described above. Note that the permutations of latitude were exact; that is, we enumerated all 720 possible permutations of the six latitude values. We determined the final P-value for the overall association between latitude and the environmental variables as the proportions of permutations revealing a  $\chi^2$ -value at least as large as that of the original data. We implemented this test in R with the aid of the function *permutations* of the package 'gtools' (version 3.8.1; Warnes et al. 2018).

To test for potential latitudinal differences in DBH of trees across our sample, we fitted a linear mixed model (LMM: Baayen 2008) with a Gaussian error distribution using the 'lme4' package in R (Bates et al. 2015) with genus and site as random effects, and the latitude of each individual tree as a test predictor.

We lacked specific location information on several trees at Fongoli (n=264) and elsewhere (n=16) and therefore assigned the latitudinal midpoint of the respective site. As the distribution of the response variable was highly skewed, we considered using a GLMM with Gaussian error and log link function, however found that this model severely violated assumptions about normally distributed residuals. Therefore, we chose the LMM with a log transformed DBH response to meet model assumptions of normally distributed and homogenous error. We initially tested the potential latitudinal effects of number of trees per vegetation plot in a similar manner using a generalized linear mixed model (GLMM) with Poisson error distribution, with latitude of each vegetation plot as a test predictor and site as a random effect. However, this model suffered from overdispersion (which can lead to increased type I error rates: Gelman & Hill 2007) and complete separation issues. We therefore fitted the model using a Negative Binomial error structure instead, lacking as well the random effect of site and found this resolved both issues. To ease comprehension of the model estimates, we z-transformed latitude for both models. We compared the fit of the full models to their respective null models using a likelihood ratio test (Forstmeier and Schielzeth 2011). Each null model was identical to the full model except it lacked the test predictor, latitude. Prior to fitting the DBH model, we checked for deviations from model assumptions of normally distributed and homogenous residuals using visual inspection of qq-plots and residuals plotted against fitted values. We assessed model stability by excluding levels of the random effects one at a time and comparing the estimates derived from these datasets with those derived for the full dataset. We did not identify any issues with both final models. We estimated effect sizes of both models using the function *r.squaredGLMM* of the package 'MuMIn' (Barton 2019), and report the variance explained by the fixed effects (marginal  $R^2_m$ ) and the fixed and random effects (conditional  $R^2_c$ ; Nakagawa & Schielzeth 2013). Our dataset for the DBH model included 7200 trees over six sites and 74 genera, whereas data for the vegetation plot model included a total of 873 vegetation plots across five sites.

#### *Ethical Note*

The research presented here was non-invasive and did not directly involve research on any animal subjects. All research, human and non-human, was approved by the Max Planck Society, and permission

for this research was granted by the Direction des Eaux, Forêts, Chasses et de la Conservation des Sols in Senegal. The authors declare that they have no conflict of interest.

## RESULTS

The discovery of night nests during reconnaissance surveys (i.e., recces) confirmed chimpanzee presence at all surveyed sites (Table 1). Surveyed transects averaged 58.5 km per site (range: 20-94 km), and chimpanzee nests were discovered on all transects except at Hérémakhono. Generally, far fewer nests were discovered at Hérémakhono than at all other sites (Table 1). Across transects in which chimpanzee nests were discovered, chimpanzee densities averaged 0.11 individuals km<sup>-2</sup> (range: 0.05 – 0.29 individuals km<sup>-2</sup>). A sufficient number of nests were encountered at these sites (mean ± SE: 89.6 ± 15.0, range: 66 - 147) to reliably estimate chimpanzee densities (Kühl et al. 2008). Overall, chimpanzee densities significantly declined at increasing latitudes towards the range limit (Table 1).

**Table 1.** Estimates of chimpanzee density, survey lengths, and climate characteristics for each of the six sites in this study, ordered from north (top) to south (bottom). Significant ( $p < 0.05$ ) latitudinal patterns are indicated in underscored bold text.

| Site             | Longitude / Latitude | Number of Grid Cells | Total Distance Surveyed (km; Survey Length) | Total Nests Encountered on Transects (on Recces) | Chimpanzee Density ( $\pm$ SE; indiv. / km <sup>2</sup> ) | Mean Daily Temp (° C) | Mean Daily Maximum Temp (° C) | Average Annual Rainfall (measured rainfall; mm) |
|------------------|----------------------|----------------------|---------------------------------------------|--------------------------------------------------|-----------------------------------------------------------|-----------------------|-------------------------------|-------------------------------------------------|
| Hérémakhono      | 823665 / 1486000**   | 20                   | 40.0 (20.0)                                 | <u>0 (21)</u>                                    | <u>0.00</u>                                               | 30                    | 37                            | <u>849</u>                                      |
| Kayan            | 797836 / 1462391     | 74                   | 94.0 (31.3)                                 | <u>66 (410)</u>                                  | <u>0.05 (0.04 – 0.05)</u>                                 | 28                    | 37                            | <u>906 (1109)</u>                               |
| Makhana          | 803500 / 1441000     | 20                   | 60.0 (20.0)                                 | <u>66 (350)</u>                                  | <u>0.07 (0.07 – 0.08)</u>                                 | 30                    | 39                            | <u>966</u>                                      |
| Kanoumering      | 816000 / 1418500     | 20                   | 60.0 (20.0)                                 | <u>81 (481)</u>                                  | <u>0.09 (0.08 – 0.10)</u>                                 | 30                    | 35                            | <u>1029</u>                                     |
| Fongoli          | 803000 / 1401000     | 20                   | 20.0 (20.0)                                 | <u>89 (*)</u>                                    | <u>0.29 (0.26 – 0.33)</u>                                 | 29                    | 37                            | <u>1086 (1016)</u>                              |
| Dindéfelo        | 791841 / 1368583     | 79                   | 73.8 (36.9)                                 | <u>147 (*)</u>                                   | <u>0.13 (0.12 – 0.15)</u>                                 | 29                    | 34                            | <u>1220 (1243)</u>                              |
| <i>p - value</i> | -                    | -                    | -                                           | -                                                | <u>0.017</u>                                              | 0.64                  | 0.23                          | <u>&lt;0.01</u>                                 |
| <i>rho (ρ)</i>   | -                    | -                    | -                                           | -                                                | <u>-0.94</u>                                              | 0.25                  | 0.58                          | <u>-1.00</u>                                    |

\* Recces were not surveyed in these permanent research sites

\*\* Coordinates were approximated as this study site overlaps two UTM zones (28N and 29N)



Overall, we found a significant association between the environmental variables and latitude (Fisher's omnibus test in combination with permutation procedure:  $\chi^2 = 58.37$ ,  $P=0.038$ ), indicating broad ecological difference within our measured variables across these six sites (Figure 2).

The average midpoint temperature across the six sites was 29.3 °C, and the average daily maximum temperature was 37.0 °C (Table 1). Overall, we observed no differences in temperature midpoints among the sites for daily mean temperature, as well as mean daily maximum temperature (Table 1). Average annual rainfall from global datasets for these sites was 1009 mm  $\pm$  133 (SD; range: 849 – 1220mm) and indicated a significant latitudinal decrease in rainfall by over 350 mm (Table 1). These values corresponded well to our measurements of rainfall from 2013 for both Dindefelo and Fongoli, but underestimated rainfall measurement by 200 mm at Kayan. Mean measured rainfall for the region was 1123  $\pm$  66 mm year<sup>-1</sup> (SE).

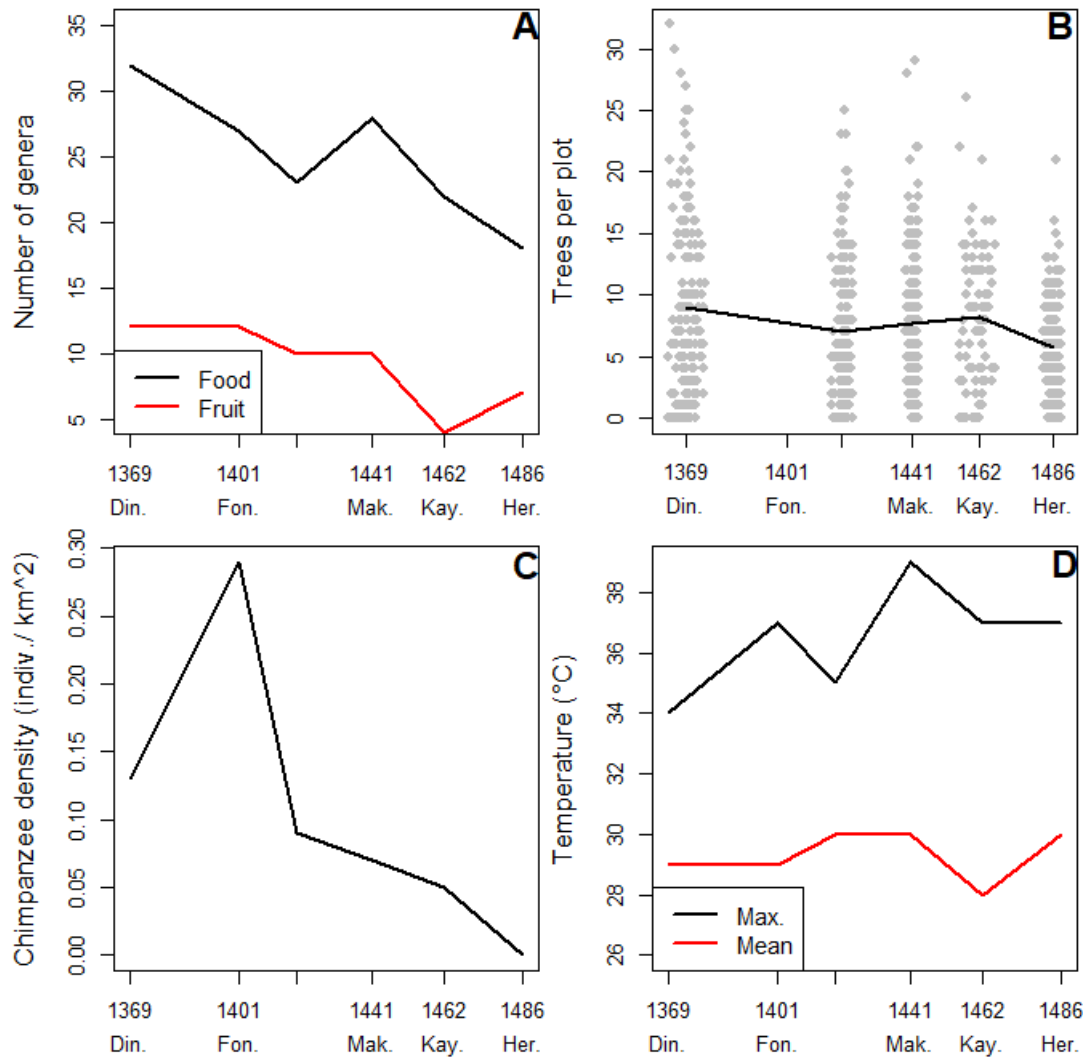

**Figure 3.** Latitudinal variation of (A) number of genera (B) Number of trees per plot, (C) chimpanzee density, and (D) Daily temperature across the six study sites. X-axes depict latitudinal midpoints for each site (rounded to the nearest 10000 m: UTM Zone 28N), with the exception of the datapoints in panel B, which are located at true latitudes of each plot.

440 **Table 2.** Vegetation plot summaries for six sites in Senegal, ordered from north (top) to south (bottom).  
441 Significant ( $p < 0.05$ ) latitudinal patterns are indicated in underscored bold text.

| Site                           | Total number of trees | Number of vegetation plots | Tree density (indiv. ha <sup>-1</sup> ) | Fleshy fruit tree density (indiv. ha <sup>-1</sup> ) | Average number of trees per plot $\pm$ SD | % high density plots (50%*) | % high density plots (66%**) | Average DBH (cm) $\pm$ SD***             | Overall BA ha <sup>-1</sup> (m <sup>2</sup> ha <sup>-1</sup> ) |
|--------------------------------|-----------------------|----------------------------|-----------------------------------------|------------------------------------------------------|-------------------------------------------|-----------------------------|------------------------------|------------------------------------------|----------------------------------------------------------------|
| Hérémakhono                    | 1162                  | 201                        | 144.5                                   | 25.9                                                 | <u><b>5.77 <math>\pm</math> 3.68</b></u>  | 1.00                        | 0.50                         | <u><b>19.3 <math>\pm</math> 11.7</b></u> | 6.38                                                           |
| Kayan                          | 758                   | 93                         | 203.8                                   | 48.7                                                 | <u><b>8.15 <math>\pm</math> 5.41</b></u>  | 7.53                        | 3.23                         | <u><b>19.2 <math>\pm</math> 10.3</b></u> | 7.50                                                           |
| Makhana                        | 1530                  | 199                        | 192.2                                   | 50.4                                                 | <u><b>7.69 <math>\pm</math> 5.49</b></u>  | 7.54                        | 2.51                         | <u><b>19.3 <math>\pm</math> 13.2</b></u> | 9.75                                                           |
| Kanoumering                    | 1398                  | 200                        | 174.8                                   | 37.0                                                 | <u><b>6.99 <math>\pm</math> 5.35</b></u>  | 7.50                        | 1.50                         | <u><b>19.2 <math>\pm</math> 11.0</b></u> | 6.94                                                           |
| Fongoli                        | 727                   | -                          | -                                       | -                                                    | -                                         | -                           | -                            | <u><b>19.2 <math>\pm</math> 16.0</b></u> | -                                                              |
| Dindefelo                      | 1637                  | 181                        | 226.1                                   | 66.2                                                 | <u><b>9.04 <math>\pm</math> 7.19</b></u>  | 19.33                       | 7.18                         | <u><b>18.2 <math>\pm</math> 10.9</b></u> | 9.29                                                           |
| <i>p - value</i>               |                       |                            | 0.35                                    | 0.23                                                 | (see Table 3)                             | 0.23                        | 0.23                         | (see Table 3)                            | 0.45                                                           |
| <i>rho (<math>\rho</math>)</i> | -                     | -                          | -0.60                                   | -0.70                                                | (see Table 3)                             | -0.70                       | -0.70                        | (see Table 3)                            | -0.50                                                          |

442 \* Corresponds to 50% of the maximum 32 trees per plot (16 or more trees per plot)

443 \*\* Corresponds to 66% of the maximum 32 trees per plot (21 or more trees per plot)

444 \*\*\* Site mean controlled for tree genus

445  
446 In total, we recorded data on 7209 trees over a 41.7 ha sampling area across the six sites (Table 2). Tree  
447 density across our dataset averaged 188 trees ha<sup>-1</sup> (range: 145 – 226 trees ha<sup>-1</sup>) but showed no consistent  
448 pattern in density across latitudes (Table 2). As a measure of preferred food tree species density, fleshy  
449 fruit tree densities averaged 45.6 trees ha<sup>-1</sup> across the dataset (range: 25.9 - 66.2 trees ha<sup>-1</sup>), with  
450 Hérémakhono containing the lowest density, 30% lower than the density of the site most similar in  
451 density. However, we found no consistent pattern of fleshy fruit tree densities across a latitudinal gradient  
452 (Table 2).

453  
454 Although related to tree density, the number of trees per plot and its variance provide insight into the  
455 potential habitat structure of each site (Table 2). Across the dataset, we found an average of 7.4 trees per  
456 plot (range: 0 to 32 trees per plot). Investigating whether the number of trees per plot varied across a  
457 latitudinal gradient, we found a significant effect (Table 3). Specifically, the number of trees per plot  
458 negatively correlated with latitude, indicating fewer trees per plot as plots increased in latitude (Table 3).  
459 This corresponded to an average decrease in 2.7 trees per plot over the measured range, although the

explained variance in trees per plot by this model was exceptionally low ( $R^2_m$ : 0.028,  $R^2_c$ : 0.018). This pattern appears to be driven by Hérémakhono, which averaged 5.8 trees compared to site means of 7.0 - 9.0 trees per plot at the other sites, while likewise appearing more consistent in number of trees per plot over the site as a whole, with standard deviation of Hérémakhono plots at 3.7 trees per plot compared to 5.4 - 7.2 trees per plot at the other sites.

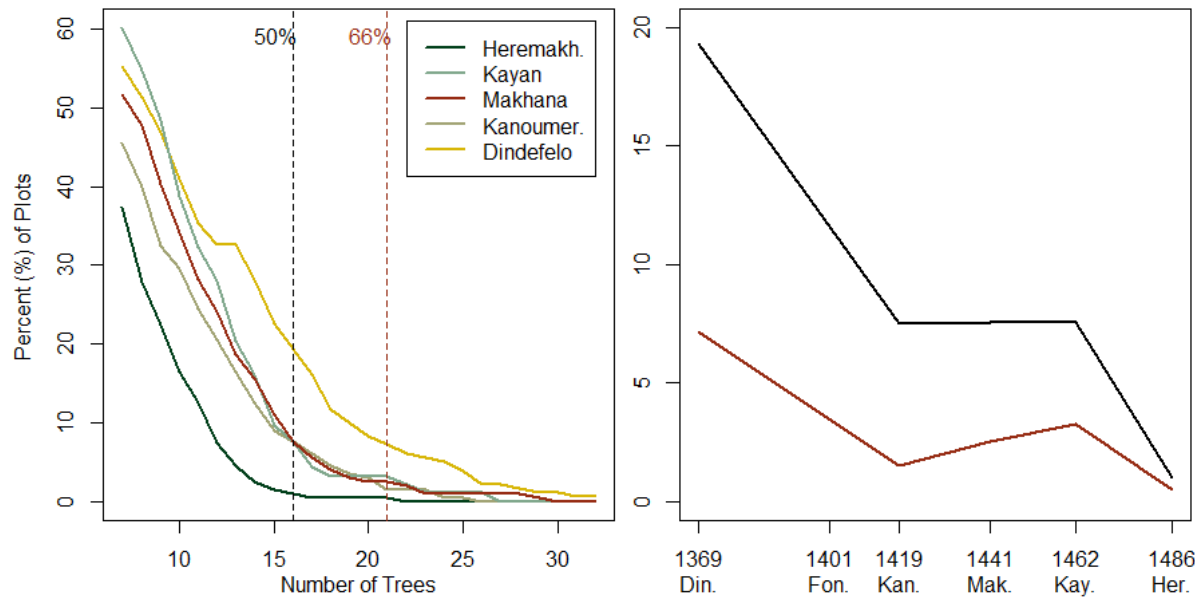

**Figure 4.** (Left) Percent of vegetation plots (y-axis) containing a minimum number of trees (x-axis, range from approximate average number of trees per plot (7 trees) to maximum number of trees per plot observed in the dataset (32 trees). Vertical lines represent the 50% and 66% of the maximum number of trees per plot. (Right) Changes in percentage of 50% (black) and 66% (red) high density plots across sites and latitudes. X-axis depicts latitudinal midpoints for each site (rounded to the nearest 10000 m: UTM Zone 28N).

**Table 3.** Model results for the effect of latitude on (a) DBH (cm) and (b) number of trees per plot. Estimates and standard errors of both models are back transformed to their original scales.

| (a) DBH (cm) across site (LMM; log transformed)  |               |          |        |
|--------------------------------------------------|---------------|----------|--------|
| Term                                             | Estimate ± SE | $\chi^2$ | p      |
| (Intercept)                                      | 18.7 ± 1.0    | -        | -      |
| Latitude*                                        | 1.0 ± 1.0     | 6.912    | 0.009  |
| (b) Number of trees per plot (Negative binomial) |               |          |        |
|                                                  | Estimate ± SE | $\chi^2$ | p      |
| (Intercept)                                      | 7.4 ± 1.0     |          |        |
| Latitude**                                       | -0.9 ± 1.0    | 20.463   | <0.001 |

\* z-transformed, mean ± SD at the original scale: 1425943 ± 39802

\*\* z-transformed, mean ± SD at the original scale: 1433728 ± 40715

Hérémakhono demonstrated considerably reduced percentages of high-density habitats (1.0% of plots at 50% of the maximum number of trees; Table 2, Figure 3) relative to the four other sites (range: 7.5-19.3% plots), and this paucity remained consistent regardless of the choice of threshold used to define a high density plot (Figure 3). This pattern, however, did not reach significance (Table 2). If we re-defined high-density plots more steeply at 66% of the maximum, Hérémakhono appeared to offer almost no closed-canopy habitats (0.5%), whereas all other sites offered at least small fractions (range: 1.5-7.2% plots). This pattern likewise did not reach significance (Table 2). Despite the lack of statistical significance, both thresholds followed clear decreases from one latitudinal extreme to the other. These results were comparable to on-the-ground observations during the study that Hérémakhono tree distribution appeared relatively even throughout the study area, but with a complete absence of closed-canopy type habitats.

We identified 78 unique genera across the dataset, with an average of  $39 \pm 4$  (SE) identified genera at each site (range: 30 – 58 species). The number of food genera available to chimpanzees significantly decreased with increasing latitude (Table 4). This pattern was likewise significant for fleshy fruit tree genera, which averaged  $9 \pm 1$  (SE) genera across sites (range: 4 – 12 genera). Hérémakhono offered the fewest food and among the fewest fruit species of all sites, nearly half of that in our southern-most site, Dindefelo. The only site which had fewer fruit species was Kayan, which may simply be due to under sampling (see ESM).

**Table 4.** Percent of trees within each dietary category, and number of genera per site. Significant ( $p < 0.05$ ) and trend ( $p < 0.10$ ) latitudinal patterns are indicated in underscored bold text.

| Site                  | Number of consumed genera (# of fleshy fruit genera) | Percentage of trees per dietary category (%) |           |                      |                                |                            |
|-----------------------|------------------------------------------------------|----------------------------------------------|-----------|----------------------|--------------------------------|----------------------------|
|                       |                                                      | Fruit                                        | Non-fruit | Non-consumed         | Non-consumed ( <i>Acacia</i> ) | Consumed ( <i>Acacia</i> ) |
| Hérémakhono           | <u><b>18 (7)</b></u>                                 | 31.6                                         | 43.9      | <u><b>13.1</b></u>   | 1.5                            | 10.0                       |
| Kayan                 | <u><b>22 (4)</b></u>                                 | 39.4                                         | 40.1      | <u><b>12.8</b></u>   | 0.7                            | 7.0                        |
| Makhana               | <u><b>28 (10)</b></u>                                | 38.3                                         | 45.8      | <u><b>14.9</b></u>   | 0.1                            | 0.8                        |
| Kanoumering           | <u><b>23 (10)</b></u>                                | 34.2                                         | 42.3      | <u><b>18.4</b></u>   | 0.3                            | 4.8                        |
| Fongoli               | <u><b>27 (12)</b></u>                                | 42.1                                         | 29.0      | <u><b>28.5</b></u>   | 0.4                            | 0.0                        |
| Dindefelo             | <u><b>32 (12)</b></u>                                | 43.5                                         | 23.1      | <u><b>30.7</b></u>   | 0.0                            | 2.7                        |
| <i>p</i> - value      | <u><b>0.058 (0.011)</b></u>                          | 0.103                                        | 0.136     | <u><b>0.017</b></u>  | 0.103                          | 0.136                      |
| <i>rho</i> ( $\rho$ ) | <u><b>-0.829 (-0.912)</b></u>                        | -0.771                                       | 0.714     | <u><b>-0.943</b></u> | 0.771                          | 0.714                      |

Of the floristic composition found at each site, an average of  $75.6 \pm 2.5\%$  (SE, range: 66.6 to 84.1%) of trees at each site produced at least one plant part known to be consumed by Fongoli chimpanzees. We observed clear increases in number of *Acacia* trees at Hérémakhono relative to other sites, with over 11% of identified trees falling within this genus, relative to a non-Hérémakhono average of  $3.4 \pm 1.3\%$  (SE; Table 4). We observed an average of  $38.2 \pm 1.9\%$  (SE) non-*Acacia* trees in our dataset which are eaten for their fruits (both fleshy and non-fleshy; range: 31.6 to 43.5%). Hérémakhono had the lowest percent of non-*Acacia* fruit trees (31.6%) but the highest percentage of edible *Acacia* trees (10.0%) in comparison with edible *Acacia* percentages between 0.8 – 7.0% at other sites. We observed a decrease in non-consumed species with increasing latitudes (Table 4).

With regard to potential differences in size of trees among the sites, we observed a significant latitudinal effect on tree size, as measured by DBH ( $R^2_m$ : 0.002,  $R^2_c$ : 0.453; Table 3). The fitted model estimated a 3.3 cm increase in DBH over the measured range (126.1 km). Average DBH across all trees was 18.7 cm (total range: 10 to 250 cm) when controlling for the confounding effect of genus and site, although site averages varied little (range: 18.2 – 19.3 cm; Table 2) and were fairly consistent in intra-site variation (SD range: 10.3-16.0 cm). Overall tree basal area (BA) averaged  $8.0 \pm 0.7 \text{ m}^2 \text{ ha}^{-1}$  (SE) across the dataset (range: 6.4 – 9.7  $\text{m}^2 \text{ ha}^{-1}$ ) but did not follow a latitudinal pattern across the sites (Table 2).

## DISCUSSION

Building on the work of several researchers before us (McGrew et al. 1981, Baldwin 1979, Bogart and Pruetz 2008, 2011; Lindshield et al. 2019), we describe here the habitat characteristics of multiple previously undescribed sites in a savanna-mosaic ecoregion, and relate this to the structure of the range edge of the western chimpanzee. As predicted, we found that chimpanzee densities declined with increasing proximity to the range limit, and that several habitat characteristics likewise declined in parallel. We observed distinct differences in these measures in particular in the northernmost site (Hérémakhono) from the more southern sites, providing additional support that Hérémakhono likely represents the last

vestige of chimpanzee occupation at the limit. These insights have the potential to further inform us as to the structure of the chimpanzee distributional limit and the potential limits to chimpanzee niche tolerance overall.

The habitat characteristics of the savanna-mosaics described here offer a point of comparison to results from chimpanzees living in more heavily forested habitats (Potts et al. 2009; Bortolomial et al. 2014; Potts and Lwanga 2013). In comparison to average tree size (as measured in DBH) in forested habitats (e.g., feeding trees: Chapman et al. 1995; Tweheyo and Lye 2003; Janmaat et al. 2016), tree size appears to be overall smaller in our savanna-mosaic dataset. Additionally, basal area coverage of our dataset confirm that these landscapes harbor less tree coverage compared to forested sites (Potts and Lwanga 2013; Bortolomial et al. 2014) as is expected based on global patterns (Crowther et al. 2015). As such, the assumption that these habitats offer reduced food availability than forested habitats is broadly confirmed if measured by basal area alone; however direct phenological comparison (Wessling et al. 2018a) suggests tree abundance may not reflect the best measures of food availability as food production rates may vary across landscapes. Additionally, savanna-mosaic landscapes appear to offer on average fewer genera (average 39 sampled genera per site; this study) than forested habitats (e.g., 66 genera: Potts and Lwanga 2013), thereby underlining why savanna chimpanzee dietary breadths (Pruetz 2006; Webster et al. 2014) are comparatively narrower than those of their forest-dwelling counterparts (Watts et al. 2012; Wrangham 1977).

We have observed a pattern of chimpanzee density decline over approximately 126 km within a single ecoregions, thereby these results signal that chimpanzee biogeography may conform to abundant center niche patterns (Sexton et al. 2009), with highest chimpanzee densities towards the center of their range. Higher density estimates from sites farther south in Guinea and Guinea-Bissau (e.g., Sousa et al. 2011; WCF 2016; Kühl et al. 2017) further extend this gradient within the biogeographical range of the subspecies.

Environmental conditions broadly varied with decreasing distance to the chimpanzee range limit, and amongst our metrics lie a few potential contributors of environmental drivers of this limit (e.g., reduced food species diversity, refuge from heat, and water availability). Kortlandt (1983) argued that chimpanzees in this region require diverse plant species communities to support their diverse diet. Such a hypothesis is supported by evidence from East Africa demonstrating that fruit species richness (Balcomb et al. 2000), especially fruit species that produce fruits during periods of low food availability (Potts et al. 2009; Bortolamiol et al. 2014), are predictors of chimpanzee densities. Floral diversity, specifically fruit species diversity, may therefore be a limiting factor across the chimpanzee range in not only determining local chimpanzee densities (Balcomb et al. 2000; Potts et al. 2009; Bortolamiol et al. 2014), but also determining their biogeographical limits. We find initial evidence that such a pattern may hold in this landscape, as floristic diversity declined with decreasing distance to the range limit.

The mechanism by which this may influence chimpanzee distribution is in the restriction of the number of food choices available from which chimpanzees may select, especially when preferred food items become scarce. Chimpanzees switch to less preferred food items (i.e., non-fruit items) when preferred food items are not available (Wrangham et al., 1991; Furuichi et al., 2001). If these food items are also constrained, they may need to switch to fallback foods. For example, Webster et al. (2014) previously concluded that reduction in dietary diversity likely drove the Toro-Semliki chimpanzees to higher rates of insectivory. If chimpanzees at Hérémakhono have fewer overall food and fleshy fruit genera available to them, they are likely to face more frequent or pronounced periods of resource scarcity. The increases in food patch size (i.e., increased DBH) we observed may help to offset these constraints at Hérémakhono, however patch size can only offset abundance constraint as long as ephemeral food patches remain continuously present.

Hérémakhono chimpanzees do appear to avoid severe nutritional deficits by depending on fallback foods exceptional to dietary patterns of other chimpanzees in the region ( $^{13}\text{C}$  enriched dietary items e.g.,  $\text{C}_4$  grasses or domestic crops: Wessling et al. 2019). One potential candidate may be an increased reliance on *Acacia* food items, as the Hérémakhono flora was disproportionately comprised of consumed *Acacia*



species relative to the other sites. Although *Acacia* trees are important food items for some primates (Isbell et al. 2013, Barnes 2001) they are infrequently consumed at Fongoli (Pruetz 2006). That Hérémakhono chimpanzee density was so low is suggestive that *Acacia* is likely to be an insufficient fallback food to compensate for restricted food species diversity in this landscape and that these chimpanzees may already be stretched to the edge of their dietary flexibility.

While intra-annual variation of fruit is a frequent consideration in explaining chimpanzee behavior and physiology (e.g., Chapman et al. 1995; Boesch 1996; Murray et al. 2006; Wittiger & Boesch 2013; Samuni et al. 2018; Wessling et al. 2018a,b) it is an underappreciated predictor of chimpanzee distribution across sites, despite clear indications that it is an important determinant of other frugivorous primate distribution (e.g., Marshall et al. 2009b, 2014). Our results suggest that quantification of fruit species assemblages comprise an important measure of food availability consistency and dietary tradeoffs as potential limitations to chimpanzee distribution. In this sense, chimpanzee would appear to be subject to the same constraint generally considered to limit primate distribution—food availability during periods of food scarcity (e.g., Potts et al. 2009, Marshall & Leighton 2006; Marshall et al. 2009a).

However, in an extreme ecoregion for chimpanzees like the savanna-mosaics of southeastern Senegal, potential dietary limitations of floral assemblages form only part of the picture. In these landscapes, closed canopy habitats are rare and frequently fall below 5% of total land coverage, with preferred habitats like gallery forest covering closer to 2% (McGrew et al., 1988; Bogart and Pruett 2008; Pruett and Bertolani, 2009; Lindshield et al. 2019). These habitat types are especially important, as Fongoli chimpanzees preferentially spend their time in these habitats as a presumable means of behavioral thermoregulation (Pruetz and Bertolani 2009). If our estimation of high-density plots serves as a suitable proxy for these habitat types, then these habitats are consistently relatively rare across our sites, with a drop-off at the northern reaches. As such, it is likely that these habitats offer fewer and fewer refuges for chimpanzees to avoid the high temperatures (37 ° C average daily maxima). Although at a site level tree density was similar to that of the other sites, average number of trees per plot was lowest and least variable at Hérémakhono, with the percentage of high-density plots likewise close to zero. Hérémakhono

therefore was rather uniform in habitat types available and offered little to no shaded habitats for chimpanzees under the same thermal challenges, an observation we also anecdotally observed during data collection. As thermoregulatory stress is particularly constraining for chimpanzees in Senegal (Wessling et al. 2018b), we find some indication that McGrew et al.'s (1981) hypothesis that the lack of thermal refuge is a contributing determinant of the chimpanzee range limit is correct, especially as obligatory resting time due to thermal constraints is thought to be a limit to primate biogeography (Korstjens et al. 2010). In this sense, minimum number of resting opportunities (i.e., refuge locations) may be another regulating component of chimpanzee (and likely other species') biogeography.

Water availability has also been identified as a general factor dictating chimpanzee site suitability in Senegal (Lindshield 2014), and any reduction in water availability is likely to directly exacerbate an already significant constraint to chimpanzees in this landscape (Wessling et al. 2018b). Our results indicated significant decreases in average rainfall patterns with increasing latitude, likewise supported by the aforementioned arboreal differences. Floristic assemblages in tropical ecosystems are strongly influenced by rainfall patterns (Bongers et al. 1999; Engelbrecht et al. 2001), and the increase in arid-adapted arboreal flora like *Acacia* species likewise corroborate evidence of increasingly arid conditions at the northern limit of the chimpanzee range. Rainfall therefore appears to play a considerable role in shaping mechanistic limitations to savanna chimpanzee distribution, in that it directly influences water availability to chimpanzees in a thermally challenging environment, while likewise shaping floristic (and therefore potential dietary) composition.

It is therefore possible that all three of these constraints (floral assembly/dietary availability, opportunities for thermal refuge, and water availability) collectively contribute as proximate determinants of the chimpanzee range limit. While we can consider the ecological variation described here within the context of longer-term, coarse-grained patterns previously described at national and continent-wide scales (Simpson 1964; Rosenzweig 1995; Crowther et al. 2015), we must also acknowledge that all of our sites are outside of formal protection zones and experience some degree of anthropogenic disturbance. Although Tappan et al. (2004) previously found that the Shield ecoregion remained relatively stable in

vegetation cover relative to other ecoregions, it is unclear if floristic communities have continued to remain regionally stable. Nomadic pastoralists in the region specifically target key tree species to chimpanzees (Massa 2011) and felling for livestock fodder was evident at all six sites. How these and other anthropogenic influences shape the biotic communities chimpanzees inhabit and how this varies across the range edge will inform us on the role humans play in dictating chimpanzee distribution locally and regionally. Nonetheless, whether the ecological patterns we describe here are natural or anthropogenic in origin is irrelevant to the interpretation of our findings, as both lead to the same consequential pattern of environmental drivers of chimpanzee decline at the range limit. Additional investigation into direct anthropogenic or predatory influence on the chimpanzee range edge will likewise be informative as to the relative importance of direct top-down processes, although that we find environmental correlates with chimpanzee density here suggests that they are unlikely to be the sole determinants of the chimpanzee range.

Chimpanzee densities appear to be nonetheless sustained over the range edge until they appear to crash at the limit. Complementary evidence suggests that the habitat of Hérémakhono differs significantly enough in its biotic structure that it may potentially fail to support a full chimpanzee community. The exceptionally low chimpanzee encounter rates as well as the fact that no nest groups larger than three nests (Wessling, unpublished data) were discovered at Hérémakhono indicate that the chimpanzees living at this site form an exceptionally small social unit. While we do not have data to indicate if this landscape represents a demographic sink, it is nonetheless likely that Hérémakhono represents a form of distribution 'bleed-over' and may serve as the marginal transition zone between habitats for which chimpanzees are adapted (e.g., Fongoli: Wessling et al. 2018b) and those in which they are not. These habitats may be temporarily attractive to migrating individuals, for example, as a means to reduce competition, and therefore may even be examples of ecological traps (Battin 2004). Although we do not have essential complementary demography data to investigate whether these habitats negatively impact chimpanzee reproductive success and survival, our results indicate that the habitat of Hérémakhono may represent a population sink. Further investigation into the permanence, behavioral ecology, demography,

and movement of chimpanzees around these locations may better inform us on the population dynamics of the range edge.

Furthermore, if additional evidence supports Hérémakhono as a marginal habitat or transition zone (Kawecki 2008), the Kayan region would subsequently represent the limit of the chimpanzee fundamental niche, despite it not being the biogeographic limit of chimpanzee distribution. Such biogeographic 'bleed-over', therefore, has significant implications for species' ENMs and predictive models that use species' distribution patterns to estimate potential suitable habitat in areas where occurrence is unknown. Data from bleed-over regions, or population sinks more generally (Pulliam 1988), are likely to lead ENM models to predict a larger range of suitable environmental conditions than what is sustainable, thereby overestimating suitable habitat coverage for that species.

Lastly, our analyses offer exploratory insights into intermediary landscape-level factors between regional level analyses and site-based investigations of chimpanzee habitat characteristics. Regional level analyses often fail to account for smaller-scale processes and variation that may also impact habitat suitability (Abwe et al. 2019), and therefore overlook smaller-scale environmental processes like those we describe here. Instead, our results offer a method of ground-truthing the conclusions of larger-scaled studies and broad-scaled ENMs with regard to the governing environmental variables to chimpanzee distribution. We advocate that similar analyses be conducted to evaluate these patterns at the species level once larger datasets become available. Although species range distributions are often abiotically limited (Pearson & Dawson 2003), we offer several proximate mechanisms here through which these limits might be intermediated by biotic patterns for a large bodied organism. We describe several climatically-driven latitudinal patterns on biotic components of the environment (e.g., conversion of floristic composition to arid adapted flora) as well as biotic contributions to climatic constraints (e.g., refuge from heat via vegetative cover), thereby highlighting additional complexities to range limits likely to be overlooked by broad-scaled ENMs. These complexities suggest that distributional modelling which can integrate data with locally scaled mechanistic implications (e.g. Marshall et al. 2014; Foerster et al. 2016)

may be most effective at accurately estimating nuanced distributional constraints for many species, including the chimpanzee.

While we attempt here to describe the range dynamics of the chimpanzee, such an approach is not limited to these apes and may be applied across other species. Analyses like those we present here should allow contextualization of species' niche patterns over both broader spatial and temporal extents and would ideally allow additional evaluations of the effect of both bottom-up and top-down considerations upon species' niche limitations simultaneously. Furthermore, the identification of processes dictating species limits and not just patterns explaining distribution or abundance will become increasingly informative in the face of widespread species declines and forecasting the effects of climate change on primates or other species (Martinez-Meyer 2005), as processes of range limitations will dictate a species' ability to shift alongside a changing environment.

## **ACKNOWLEDGEMENTS**

We thank the Direction des Eaux, Forêts, Chasses et de la Conservation des Sols for their permission to conduct this work in Senegal. For their assistance in coordination of the Pan African Programme and subsequent data, we thank Henk Eshuis, Mimi Arandjelovic, Gaëlle Bocksburger, and Claudia Collette-Herf. We thank Ulises Villalobos-Flores, Modi Camara, Jacques Tamba Keita, Kaly Bindia, Madi Keita, Irene Gutiérrez, Nadia Mirghani, Salam Diallo, Samba Sylla, Amadou Diallo, Daouda Diallo, Samba Diallo, Amadou Foula Diallo, Yanina Mercado, and Claudia Gallego for their assistance with data collection. Sincere thanks to Isabel Ordaz Németh for assistance with the BIOCLIM dataset, Roger Mundry for assistance with model permutations, and to Liran Samuni, Erin Kane, Stacy Lindshield, and two anonymous reviewers for their comments on previous versions of this manuscript. This research was funded by the Max Planck Society, the National Geographic Society, Iowa State University, the Max Planck Society Innovation Fund, the Krekeler Foundation, and The Jane Goodall Institutes of UK, Germany, and Spain.

## **AUTHOR CONTRIBUTIONS**

721 EGW and HSK conceived and designed the study, EGW executed the study, and PD, ML, LP, and JDP  
722 contributed materials and/or data. EGW wrote the manuscript with input from all co-authors, who have  
723 approved of the final version of this manuscript.

724

#### 725 **DATA ACCESSIBILITY**

726 Data used in this article will be made available upon reasonable request to the corresponding author.

727

## REFERENCES

- Altmann, S. A. (1974). Baboons, space, time and energy. *American Zoologist*, 14, 221–248.
- Abwe, E. E., Morgan, B. J., Tchiengue, B., Kentatchime, F., Doudja, R., Ketchen, M. E., et al. (2019). Habitat differentiation among three Nigeria–Cameroon chimpanzee (*Pan troglodytes ellioti*) populations. *Ecology and Evolution*, 9(3), 1489-1500.
- Adams, D. C., & Anthony, C. D. (1996). Using randomization techniques to analyse behavioural data. *Animal Behaviour*, 51(4), 733-738.
- Battin, J. (2004). When good animals love bad habitats: ecological traps and the conservation of animal populations. *Conservation Biology*, 18(6), 1482-1491.
- Baayen, R. H. (2008). Analyzing linguistic data: A practical introduction to statistics using R: Cambridge University Press.
- Balcomb, S. R., Chapman, C. A., & Wrangham, R. W. (2000). Relationship between chimpanzee (*Pan troglodytes*) density and large, fleshy-fruit tree density: Conservation implications. *American Journal of Primatology*, 51(3), 197-203.
- Baldwin, P. J. (1979). The natural history of the chimpanzee (*Pan troglodytes verus*) at Mt. Assirik, Senegal. University of Stirling.
- Bates, D., Maechler, M., Bolker, B., & Walker, S. (2015). Fitting Linear Mixed-Effects Models Using lme4. *Journal of Statistical Software*, 67(1), 1-48.
- Barton, K. (2019). MuMIn: Multi-Model Inference. R package version 1.43.15. <https://CRAN.R-project.org/package=MuMIn>
- Boesch, C. (1996). Social grouping in Tai chimpanzees. In L. Marchant & T. Nishida (Eds.), *Great Ape Societies* (pp. 101-113). Cambridge (UK): Cambridge University Press.
- Bogart, S. L., & Pruetz, J. D. (2008). Ecological context of savanna chimpanzee (*Pan troglodytes verus*) termite fishing at Fongoli, Senegal. *American Journal of Primatology*, 70(6), 605-612.
- Bogart, S. L., & Pruetz, J. D. (2011). Insectivory of savanna chimpanzees (*Pan troglodytes verus*) at Fongoli, Senegal. *American Journal of Physical Anthropology*, 145(1), 11-20.

754 Bongers, F., Poorter, L., Van Rompaey, R. S. A. R., & Parren, M. (1999). Distribution of twelve moist  
755 forest canopy tree species in Liberia and Cote d'Ivoire: response curves to a climatic gradient.  
756 *Journal of Vegetation Science*, 10(3), 371-382.

757 Bortolamiol, S., Cohen, M., Potts, K., Pennec, F., Rwaburindore, P., Kasenene, J., et al. (2014). Suitable  
758 habitats for endangered frugivorous mammals: small-scale comparison, regeneration forest and  
759 chimpanzee density in Kibale National Park, Uganda. *PloS One*, 9(7), e102177.

760 Brown, J. H. (1984). On the relationship between abundance and distribution of species. *The American*  
761 *Naturalist*, 124(2), 255-279.

762 Brown, J. H., Mehlman, D. W., & Stevens, G. C. (1995). Spatial variation in abundance. *Ecology*, 76(7),  
763 2028-2043.

764 Buckland, S. T., Anderson, D. R., Burnham, K. P., Laake, J. L., Borchers, D. L., & Thomas, L. (2001).  
765 Introduction to distance sampling estimating abundance of biological populations.

766 Cahill, A. E., Aiello-Lammens, M. E., Caitlin Fisher-Reid, M., Hua, X., Karanewsky, C. J., Ryu, H. Y.,  
767 Sbeglia, G.C., Spagnolo, F., Waldron, J.B. & Wiens, J. J. (2014). Causes of warm-edge range  
768 limits: systematic review, proximate factors and implications for climate change. *Journal of*  
769 *Biogeography*, 41(3), 429-442.

770 Chapman, C. A., Chapman, L. J., & Wrangham, R. (1995). Ecological constraints on group size: an  
771 analysis of spider monkey and chimpanzee subgroups. *Behavioral Ecology and Sociobiology*,  
772 36(1), 59-70.

773 Chown, S.L. and Gaston, K.J., (1999). Exploring links between physiology and ecology at macro-scales:  
774 the role of respiratory metabolism in insects. *Biological Reviews*, 74(1), pp.87-120.

775 Conklin-Brittain, N. L., Wrangham, R. W., & Hunt, K. D. (1998). Dietary response of chimpanzees and  
776 cercopithecines to seasonal variation in fruit abundance. II. Macronutrients. *International Journal*  
777 *of Primatology*, 19(6), 971-998.

778 Crowther, T. W., Glick, H., Covey, K., Bettigole, C., Maynard, D., Thomas, S., et al. (2015). Mapping tree  
779 density at a global scale. *Nature*, 525(7568), 201.



780 Emery Thompson, M., Kahlenberg, S. M., Gilby, I. C., & Wrangham, R. W. (2007). Core area quality is  
781 associated with variance in reproductive success among female chimpanzees at Kibale National  
782 Park. *Animal Behaviour*, 73(3), 501-512.

783 Emery Thompson, M., Muller, M. N., Kahlenberg, S. M., & Wrangham, R. W. (2010). Dynamics of social  
784 and energetic stress in wild female chimpanzees. *Hormones and Behavior*, 58(3), 440-449.

785 Emery Thompson, M., Muller, M. N., Wrangham, R. W., Lwanga, J. S., & Potts, K. B. (2009). Urinary C-  
786 peptide tracks seasonal and individual variation in energy balance in wild chimpanzees.  
787 *Hormones and Behavior*, 55(2), 299-305.

788 Engelbrecht, B. M., Comita, L. S., Condit, R., Kursar, T. A., Tyree, M. T., Turner, B. L., & Hubbell, S. P.  
789 (2007). Drought sensitivity shapes species distribution patterns in tropical forests. *Nature*,  
790 447(7140), 80.

791 Fick, S. E., & Hijmans, R. J. (2017). WorldClim 2: new 1-km spatial resolution climate surfaces for global  
792 land areas. *International Journal of Climatology*, 37(12), 4302-4315.

793 Furuichi, T., Hashimoto, C., & Tashiro, Y. (2001). Fruit availability and habitat use by chimpanzees in the  
794 Kalinzu Forest, Uganda: examination of fallback foods. *International Journal of Primatology* 22,  
795 929–945.

796 Foerster, S., Zhong, Y., Pintea, L., Murray, C. M., Wilson, M. L., Mjungu, D. C., & Pusey, A. E. (2016).  
797 Feeding habitat quality and behavioral trade-offs in chimpanzees: a case for species distribution  
798 models. *Behavioral Ecology*, 27(4), 1004-1016.

799 Forstmeier, W., & Schielzeth, H. (2011). Cryptic multiple hypotheses testing in linear models:  
800 overestimated effect sizes and the winner's curse. *Behavioral Ecology and Sociobiology*, 65(1),  
801 47-55.

802 Gelman, A. & Hill, J. 2007. Data Analysis Using Regression and Multilevel/Hierarchical Models.  
803 Cambridge University Press. Cambridge, UK.

804 Haccou, P. & Meelis, E. (1994). *Statistical Analyses of Behavioural Data*. Oxford: University Press.

805 Hamilton, W. J., Buskirk, R. E., & Buskirk, W. H. (1976). Defense of space and resources by chacma  
806 (*Papio ursinus*) baboon troops in an African desert and swamp. *Ecology*, 57, 1264–1272.

807 Hargreaves, A. L., Samis, K. E., & Eckert, C. G. (2014). Are species' range limits simply niche limits writ  
808 large? A review of transplant experiments beyond the range. *The American Naturalist*, 183(2),  
809 157-173.

810 Heinicke, S., Mundry, R., Boesch, C., Amarasekaran, B., Barrie, A., Brncic, T., et al. (2019a).  
811 Characteristics of positive deviants in western chimpanzee populations. *Frontiers in Ecology and*  
812 *Evolution*, 7, 16.

813 Heinicke, S., Mundry, R., Boesch, C., Amarasekaran, B., Barrie, A., Brncic, T., et al. (2019b). Taxon-  
814 specific databases link data collectors, users and applications: the case of the IUCN SSC  
815 A.P.E.S. *Environmental Research Letters*.

816 Holt, R. D. (2009). Bringing the Hutchinsonian niche into the 21st century: ecological and evolutionary  
817 perspectives. *Proceedings of the National Academy of Sciences of the United States of America*,  
818 106, 19659-19665.

819 Humle T, Boesch C, Duvall C, Ellis CM, Farmer KH, Herbinger I, Blom A, and Oates JF. (2008). *Pan*  
820 *troglodytes* ssp. *verus*. The IUCN Red List of Threatened Species 2008: eT15935A5323101.

821 Humle, T., Boesch, C., Campbell, G., Junker, J., Koops, K., Kühl, H. & Sop, T. (2016). *Pan troglodytes*  
822 ssp. *verus*. The IUCN Red List of Threatened Species 2016: eT15935A102327574.

823 Hutchinson, G. E. (1961). The paradox of the plankton. *American Naturalist*, 95(882), 137-145.

824 Janmaat, K. R., Boesch, C., Byrne, R., Chapman, C. A., Goné Bi, Z. B., Head, J. S., ... & Polansky, L.  
825 (2016). Spatio-temporal complexity of chimpanzee food: How cognitive adaptations can  
826 counteract the ephemeral nature of ripe fruit. *American Journal of Primatology*, 78(6), 626-645.

827 Jantz, S., Pintea, L., Nackoney, J., & Hansen, M. (2016). Landsat ETM+ and SRTM data provide near  
828 real-time monitoring of chimpanzee (*Pan troglodytes*) habitats in Africa. *Remote Sensing*, 8(5),  
829 427.

830 Junker, J., Blake, S., Boesch, C., Campbell, G., du Toit, L., Duvall, C., et al. (2012). Recent decline in  
831 suitable environmental conditions for African great apes. *Diversity and Distributions*, 18(11),  
832 1077-1091.

833 Kawecki, T. J. (2008). Adaptation to marginal habitats. *Annual Review of Ecology, Evolution, and*  
834 *Systematics*, 39, 321-342.

835 Kinnaird, M. F., & O'Brien, T. G. (2005). Fast foods of the forest: the influence of figs on primates and  
836 hornbills across Wallace's line. In: *Tropical Fruits and Frugivores* (pp. 155-184): Springer.

837 Korstjens, A. H., Lehmann, J., & Dunbar, R. I. M. (2010). Resting time as an ecological constraint on  
838 primate biogeography. *Animal Behaviour*, 79(2), 361-374.

839 Kortlandt, A. (1983). Marginal habitats of chimpanzees. *Journal of Human Evolution*, 12(3), 231-278.

840 Kouakou, C. Y., Boesch, C., & Kühl, H. (2009). Estimating chimpanzee population size with nest counts:  
841 validating methods in Taï National Park. *American Journal of Primatology*, 71(6), 447-457.

842 Kühl, H. (2008). Best practice guidelines for the surveys and monitoring of great ape populations: IUCN.

843 Kühl, H. S., Boesch, C., Kulik, L., Haas, F., Arandjelovic, M., Dieguez, P., ... & Ayimisin, E. A. (2019).  
844 Human impact erodes chimpanzee behavioral diversity. *Science*, 363(6434), 1453-1455.

845 Kühl, H. S., Sop, T., Williamson, E. A., Mundry, R., Brugière, D., Campbell, G., et al. (2017). The Critically  
846 Endangered western chimpanzee declines by 80%. *American Journal of Primatology*, 79(9).

847 Lindshield, S. M. (2014). Multilevel analysis of the foraging decisions of western chimpanzees (*Pan*  
848 *troglodytes verus*) and resource scarcity in a savanna environment at Fongoli, Senegal. Ph.D.  
849 Thesis, Iowa State University, Ames, IA.

850 Lindshield, S., Bogart, S. L., Gueye, M., Ndiaye, P. I., & Pruetz, J. D. (2019). Informing protection efforts  
851 for critically endangered chimpanzees (*Pan troglodytes verus*) and sympatric mammals amidst  
852 rapid growth of extractive industries in Senegal. *Folia Primatologica*, 90(2), 124-136.

853 Marshall, A.J. (2009). Are Montane Forests Demographic Sinks for Bornean White-bearded Gibbons  
854 *Hylobates albibarbis*? *Biotropica* 41(2): 257–267

855 Marshall, A. J., & Leighton, M. (2006). How does food availability limit the population density of white-  
856 bearded gibbons? In G. Hohmann, M. Robbins, & C. Boesch (Eds.), *Feeding Ecology of the Apes*  
857 *and Other Primates* (pp. 311–333). Cambridge, U.K.: Cambridge University Press.

858 Marshall, A. J., Boyko, C. M., Feilen, K. L., Boyko, R. H., & Leighton, M. (2009a). Defining fallback foods  
859 and assessing their importance in primate ecology and evolution. *American Journal of Physical*  
860 *Anthropology*, 140(4), 603-614.

861 Marshall, A. J., Ancrenaz, M., Brearley, F. Q., Fredriksson, G., Ghaffar, N., Heydon, M., ... & Proctor, J.  
862 (2009b). The effects of habitat quality, phenology, and floristics on populations of Bornean and

863 Sumatran orangutans: are Sumatran forests more productive than Bornean forests? *Orangutans:*  
864 *Geographic Variation in Behavioral Ecology and Conservation*. Oxford University Press, Oxford,  
865 97-117.

866 Marshall, A. J., Beaudrot, L., & Wittmer, H. U. (2014). Responses of primates and other frugivorous  
867 vertebrates to plant resource variability over space and time at Gunung Palung National Park.  
868 *International Journal of Primatology*, 35(6), 1178-1201.

869 Martinez-Meyer, E. (2005). Climate change and biodiversity: some considerations in forecasting shifts in  
870 species' potential distributions. *Biodiversity Informatics*, 2, 42-55.

871 Massa, B.E. (2011). Predicting Conflict over Scarce Resources: Chimpanzees (*Pan troglodytes verus*)  
872 and Fulbe Pastoralists. Master's Thesis, Duke University, Durham, NC.

873 Mbow, C., Nielsen, T.T. & Rasmussen, K. (2000). Savanna fires in east-central Senegal: distribution  
874 patterns, resource management and perceptions. *Human Ecology*, 28, 561–583.

875 McGrew, W. C., Baldwin, P. J., & Tutin, C. E. (1981). Chimpanzees in a hot, dry and open habitat: Mt.  
876 Assirik, Senegal, West Africa. *Journal of Human Evolution*, 10(3), 227-244.

877 McGrew, W., Baldwin, P., & Tutin, C. (1988). Diet of wild chimpanzees (*Pan troglodytes verus*) at Mt.  
878 Assirik, Senegal: I. Composition. *American Journal of Primatology*, 16(3), 213-226.

879 Miller, D.L. (2017). Distance: Distance Sampling Detection Function and Abundance Estimation. R  
880 package version 0.9.7. <https://CRAN.R-project.org/package=Distance>

881 Milton, K., Giacalone, J., Wright, S. J., & Stockmayer, G. (2005). Do frugivore population fluctuations  
882 reflect fruit production? Evidence from Panama. In: *Tropical Fruits and Frugivores* (pp. 5-35):  
883 Springer.

884 Moegenburg, S. M., & Levey, D. J. (2003). Do frugivores respond to fruit harvest? An experimental study  
885 of short-term responses. *Ecology*, 84(10), 2600-2612.

886 Mundry, R. & Fischer, J. (1998). Use of statistical programs for nonparametric tests of small samples  
887 often leads to incorrect P-values: Examples from Animal Behaviour. *Animal Behaviour*, 56: 256 -  
888 259.

889 Murray, C. M., Eberly, L. E., & Pusey, A. E. (2006). Foraging strategies as a function of season and rank  
890 among wild female chimpanzees (*Pan troglodytes*). *Behavioral Ecology*, 17(6), 1020-1028.

- Nakagawa, S., & Schielzeth, H. (2013). A general and simple method for obtaining  $R^2$  from generalized linear mixed-effects models. *Methods in Ecology and Evolution*, 4(2), 133-142.
- Nguelet, F. L. M., Koumba, C. R. Z., Mavoungou, J. F., Nzengue, E., Akomo-Okoue, E. F., Nakashima, Y., et al. (2016). Etude de la relation entre l'abondance des grands mammifères frugivores et celle des fruits dans le Parc National de Moukalaba-Doudou, Gabon. *International Journal of Biological and Chemical Sciences*, 10(5), 1969-1982.
- Pearson, R. G., & Dawson, T. P. (2003). Predicting the impacts of climate change on the distribution of species: are bioclimate envelope models useful?. *Global Ecology and Biogeography*, 12(5), 361-371.
- Pennec, F., Krief, S., Hladik, A., Lubini Ayingweu, C., Bortolamiol, S., Bokika Ngawolo, J.-C., et al. (2016). Floristic and structural vegetation typology of bonobo habitats in a forest-savanna mosaic (Bolobo Territory, DR Congo). *Plant Ecology and Evolution*, 149(2), 199-215.
- Plumptre, A. J., & Cox, D. (2006). Counting primates for conservation: primate surveys in Uganda. *Primates*, 47(1), 65-73.
- Potter, D.M. & Griffiths, D.J. (2006). Omnibus permutation tests of the overall null hypothesis in datasets with many covariates. *Journal of Biopharmaceutical Statistics*, 16, 327–341.
- Potts, K. B., & Lwanga, J. S. (2013). Floristic heterogeneity at Ngogo, Kibale National Park, Uganda and possible implications for habitat use by chimpanzees (*Pan troglodytes*). *African Journal of Ecology*, 52(4), 427-437.
- Potts, K. B., Chapman, C. A., & Lwanga, J. S. (2009). Floristic heterogeneity between forested sites in Kibale National Park, Uganda: insights into the fine-scale determinants of density in a large-bodied frugivorous primate. *Journal of Animal Ecology*, 78(6), 1269-1277.
- Potts, K.B., Baken, E., Ortmann, S., Watts, D.P. & Wrangham, R.W. (2015). Variability in population density is paralleled by large differences in foraging efficiency in chimpanzees (*Pan troglodytes*). *International Journal of Primatology*, 36(6), 1101-1119.
- Pruetz, J. D. (2006). Feeding ecology of savanna chimpanzees (*Pan troglodytes verus*) at Fongoli, Senegal. In G. Hohmann, M. Robbins & C. Boesch (Eds.), *Feeding Ecology in Apes and Other Primates* (pp. 161-182): Cambridge University Press.

919 Pruetz, J. D. (2007). Evidence of cave use by savanna chimpanzees (*Pan troglodytes verus*) at Fongoli,  
920 Senegal: implications for thermoregulatory behavior. *Primates*, 48(4), 316-319.

921 Pruetz, J.D. (2018). Nocturnal behavior by a diurnal ape, the West African chimpanzee (*Pan troglodytes*  
922 *verus*), in a savanna environment at Fongoli, Senegal. *American Journal of Physical*  
923 *Anthropology*, 166(3), 541-548.

924 Pruetz, J., & Bertolani, P. (2009). Chimpanzee (*Pan troglodytes verus*) behavioral responses to stresses  
925 associated with living in a savannah-mosaic environment: Implications for hominin adaptations to  
926 open habitats. *PaleoAnthropology*, 2009, 252-262.

927 Pulliam, H. R. (1988). Sources, sinks, and population regulation. *The American Naturalist*, 132(5), 652-  
928 661.

929 Pusey, A., Williams, J., & Goodall, J. (1997). The influence of dominance rank on the reproductive  
930 success of female chimpanzees. *Science*, 277(5327), 828-831.

931 Quinn, G.P. & Keough, M.J. (2002). *Experimental Designs and Data Analysis for Biologists*. Cambridge  
932 University Press. Cambridge.

933 R Core Team (2019). R: A language and environment for statistical computing. R Foundation for  
934 Statistical Computing, Vienna, Austria. URL: <https://www.R-project.org/>.

935 Restrepo, C., Gomez, N., & Heredia, S. (1999). Anthropogenic edges, treefall gaps, and fruit–frugivore  
936 interactions in a neotropical montane forest. *Ecology*, 80(2), 668-685.

937 Rey, P. J. (1995). Spatio-temporal variation in fruit and frugivorous bird abundance in olive orchards.  
938 *Ecology*, 76(5), 1625-1635.

939 Rovero, F., & Struhsaker, T. T. (2007). Vegetative predictors of primate abundance: utility and limitations  
940 of a fine-scale analysis. *American Journal of Primatology*, 69(11), 1242-1256.

941 Samuni, L., Preis, A., Deschner, T., Crockford, C., & Wittig, R. M. (2018). Reward of labor coordination  
942 and hunting success in wild chimpanzees. *Communications biology*, 1.

943 Seoane, J., Justribo, J. H., García, F., Retamar, J., Rabadan, C., & Atienza, J. C. (2006). Habitat-  
944 suitability modelling to assess the effects of land-use changes on Dupont's lark *Chersophilus*  
945 *duponti*: a case study in the Layna Important Bird Area. *Biological Conservation*, 128(2), 241-252.

946 Sesink Clee, P. R., Abwe, E. E., Ambahe, R. D., Anthony, N. M., Fotso, R., Locatelli, S., et al. (2015).  
 947 Chimpanzee population structure in Cameroon and Nigeria is associated with habitat variation  
 948 that may be lost under climate change. *BMC Evolutionary Biology*, 15(1), 2.  
 949 Sexton, J. P., McIntyre, P. J., Angert, A. L., & Rice, K. J. (2009). Evolution and Ecology of Species Range  
 950 Limits. *Annual Review of Ecology, Evolution, and Systematics*, 40(1), 415-436.  
 951 Siegel, S. & Castellan, N.J. (1988). *Nonparametric Statistics for the Behavioral Sciences* (2nd ed.).  
 952 McGraw-Hill. New York.  
 953 Smith, W.P., Person, D.K., Pyara, S. (2011). Source—sinks, metapopulations, and forest reserves:  
 954 conserving northern flying squirrels in the temperate rainforests of Southeast Alaska. In: *Sources,*  
 955 *Sinks and Sustainability* (ed.) J. Liu, V. Hull, A.T. Morzillo & J.A. Wiens. Cambridge University  
 956 Press., Cambridge University Press, pp. 399-422.  
 957 Sousa, J., Barata, A. V., Sousa, C., Casanova, C. C., & Vicente, L. (2011). Chimpanzee oil-palm use in  
 958 southern Cantanhez National Park, Guinea-Bissau. *American Journal of Primatology*, 73(5), 485-  
 959 497.  
 960 Stoehr, A.M. (1999). Are significance thresholds appropriate for the study of animal behaviour? *Animal*  
 961 *Behaviour*, 57(5), F22-F25.  
 962 Stone, O. M., Laffan, S. W., Curnoe, D., & Herries, A. I. (2013). The spatial distribution of chacma baboon  
 963 (*Papio ursinus*) habitat based on an environmental envelope model. *International Journal of*  
 964 *Primatology*, 34(2), 407-422.  
 965 Thomas, L., Buckland, S. T., Rexstad, E. A., Laake, J. L., Strindberg, S., Hedley, S. L., ... & Burnham, K.  
 966 P. (2010). Distance software: design and analysis of distance sampling surveys for estimating  
 967 population size. *Journal of Applied Ecology*, 47(1), 5-14.  
 968 Tweheyo, M., & Lye, K. A. (2003). Phenology of figs in Budongo Forest Uganda and its importance for the  
 969 chimpanzee diet. *African Journal of Ecology*, 41(4), 306-316.  
 970 van Leeuwen, K.L., Hill, R. A., & Korstjens, A.J. (this issue). Quantifying chimpanzee (*Pan troglodytes*)  
 971 landscapes: An environmental approach to classifying forest and savanna chimpanzees.  
 972 *International Journal of Primatology*.

973 Vogel, E. R., Harrison, M. E., Zulfa, A., Bransford, T. D., Alavi, S. E., Husson, S., et al. (2015). Nutritional  
974 differences between two orangutan habitats: Implications for population density. *PloS One*,  
975 10(10), e0138612.

976 Warnes G.R., Bolker B. & Lumley T. (2018). gtools: Various R Programming Tools. R package version  
977 3.8.1.

978 Watts, D. P., Potts, K. B., Lwanga, J. S., & Mitani, J. C. (2012). Diet of chimpanzees (*Pan troglodytes*  
979 *schweinfurthii*) at Ngogo, Kibale National Park, Uganda, 1. Diet composition and diversity.  
980 *American Journal of Primatology*, 74(2), 114-129.

981 Webster, T. H., McGrew, W. C., Marchant, L. F., Payne, C. L., & Hunt, K. D. (2014). Selective insectivory  
982 at Toro-Semliki, Uganda: Comparative analyses suggest no 'savanna' chimpanzee pattern.  
983 *Journal of Human Evolution*, 71, 20-27.

984 Wessling, E. G., Deschner, T., Mundry, R., Pruetz, J. D., Wittig, R. M., & Kühl, H. S. (2018a). Seasonal  
985 variation in physiology challenges the notion of chimpanzees (*Pan troglodytes verus*) as a forest-  
986 adapted species. *Frontiers in Ecology and Evolution*, 6, 60.

987 Wessling, E. G., Kühl, H. S., Mundry, R., Deschner, T., & Pruetz, J. D. (2018b). The costs of living at the  
988 edge: Seasonal stress in wild savanna-dwelling chimpanzees. *Journal of Human Evolution*, 121,  
989 1-11.

990 Wessling, E. G., Oelze, V. M., Eshuis, H., Pruetz, J. D., & Kühl, H. S. (2019). Stable isotope variation in  
991 savanna chimpanzees (*Pan troglodytes verus*) indicate avoidance of energetic challenges  
992 through dietary compensation at the limits of the range. *American Journal of Physical*  
993 *Anthropology*, 168(4), 665-675.

994 White, T.C.R. (1978). The importance of a relative shortage of food in animal ecology. *Oecologia* 33, 71-  
995 86.

996 Wild Chimpanzee Foundation (2016). Report: Inventaires Biologique pour la Création du Parc National du  
997 Moyen-Bafing: Wild Chimpanzee Foundation, Leipzig, Germany.

998 Wittiger, L., & Boesch, C. (2013). Female gregariousness in Western Chimpanzees (*Pan troglodytes*  
999 *verus*) is influenced by resource aggregation and the number of females in estrus. *Behavioral*  
1000 *Ecology and Sociobiology*, 67(7), 1097-1111.



1001 Wrangham, R. W. (1977). Feeding behaviour of chimpanzees in Gombe National Park, Tanzania. *Primate*  
1002 *Ecology: Studies of Feeding and Ranging Behaviour in Lemurs, Monkeys and Apes*, 504-538.

1003 Wrangham, R., Conklin, N., Chapman, C., Hunt, K., Milton, K., Rogers, E., *et al.* (1991). The significance  
1004 of fibrous foods for Kibale Forest chimpanzees. *Philos. Trans. R. Soc. Lond. B Biol. Sci.* 334,  
1005 171–178.
